# Supplementary material
Source: MDPI journal article supplement (https://www.mdpi.com/2227-9040/10/5/159)
Supplement: s1 [file s1]

**Table S1.** Mean peak area  $\pm$  standard error of volatile aromatic compounds and their retention time (RT).

| RT     | Compound                            | R                      | COOL                    | LOOL                    | MOOL                    | HOOL                   | COOM                    | LOOM                    | MOOM                    | HOOM                    | COOS                   | LOOS                    | MOOS                     | HOOS                   | COOCP                  | LOOCP                  | MOOCP                  | HOOCP                   |
|--------|-------------------------------------|------------------------|-------------------------|-------------------------|-------------------------|------------------------|-------------------------|-------------------------|-------------------------|-------------------------|------------------------|-------------------------|--------------------------|------------------------|------------------------|------------------------|------------------------|-------------------------|
| 3.666  | Propionic anhydride                 | nd                     | nd                      | nd                      | 48249<br>$\pm$ 48249    | nd                     | 54854<br>$\pm$ 54854    | nd                      | nd                      | 36037<br>$\pm$ 36037    | nd                     | nd                      | nd                       | nd                     | nd                     | nd                     | nd                     | nd                      |
| 3.672  | Diethyl ketone                      | nd                     | 166627<br>$\pm$ 83461   | 72177<br>$\pm$ 72177    | nd                      | 54534<br>$\pm$ 54534   | 59818<br>$\pm$ 59818    | nd                      | 53483<br>$\pm$ 53483    | 45533<br>$\pm$ 45533    | 54240<br>$\pm$ 54240   | nd                      | 97205<br>$\pm$ 48712     | 39221<br>$\pm$ 39221   | 153356<br>$\pm$ 8858   | 109949<br>$\pm$ 55481  | nd                     | 41649<br>$\pm$ 41649    |
| 6.650  | 3-Hexenal                           | nd                     | 117752<br>$\pm$ 117752  | 106309<br>$\pm$ 106309  | nd                      | nd                     | nd                      | nd                      | nd                      | nd                      | nd                     | nd                      | nd                       | nd                     | 77542<br>$\pm$ 77542   | nd                     | 84099<br>$\pm$ 84099   | nd                      |
| 8.339  | 2-Hexenal                           | nd                     | 1049740<br>$\pm$ 524923 | 2811582<br>$\pm$ 668290 | 1260881<br>$\pm$ 87766  | 870211<br>$\pm$ 80546  | 168826<br>$\pm$ 168826  | nd                      | nd                      | nd                      | 7926028<br>$\pm$ 35560 | 7695713<br>$\pm$ 166307 | 2314148<br>$\pm$ 2314148 | 5675151<br>$\pm$ 96599 | 67768<br>$\pm$ 67768   | nd                     | nd                     | nd                      |
| 8.373  | 2-(1,1-dimethylethyl)-Cyclobutanone | nd                     | nd                      | nd                      | nd                      | 202920<br>$\pm$ 202920 | nd                      | 87356<br>$\pm$ 87356    | 143514<br>$\pm$ 72395   | nd                      | nd                     | nd                      | nd                       | nd                     | 62075<br>$\pm$ 62075   | 61915<br>$\pm$ 61915   | nd                     | nd                      |
| 8.453  | Trans-3-hexenol                     | nd                     | 1981975<br>$\pm$ 104302 | 637454<br>$\pm$ 637454  | 1685933<br>$\pm$ 179972 | 1204663<br>$\pm$ 94434 | 1022030<br>$\pm$ 210153 | 2298932<br>$\pm$ 245963 | 2238521<br>$\pm$ 137709 | 1128367<br>$\pm$ 564184 | nd                     | nd                      | nd                       | nd                     | 808390<br>$\pm$ 808390 | 2406772<br>$\pm$ 62554 | 2211636<br>$\pm$ 57140 | 1526284<br>$\pm$ 227066 |
| 8.460  | Bicyclobutane                       | nd                     | nd                      | nd                      | nd                      | nd                     | nd                      | nd                      | nd                      | nd                      | 114711<br>$\pm$ 114711 | 124765<br>$\pm$ 124765  | 98847<br>$\pm$ 98847     | nd                     | nd                     | nd                     | nd                     | nd                      |
| 8.879  | Heptane, 4-methylene-               | nd                     | 362912<br>$\pm$ 184657  | 159845<br>$\pm$ 159845  | 294014<br>$\pm$ 150099  | 228187<br>$\pm$ 114739 | 627652<br>$\pm$ 33446   | 92013<br>$\pm$ 92013    | 171018<br>$\pm$ 86878   | 133760<br>$\pm$ 66916   | 1191504<br>$\pm$ 12688 | 1116793<br>$\pm$ 19882  | 1009304<br>$\pm$ 14741   | 783922<br>$\pm$ 31893  | 227210<br>$\pm$ 113632 | 325749<br>$\pm$ 3440   | 294493<br>$\pm$ 1588   | 70502<br>$\pm$ 70502    |
| 10.703 | 3-Ethyl-1,5-octadiene Isomer I      | nd                     | 96418<br>$\pm$ 48376    | 22520<br>$\pm$ 22520    | nd                      | nd                     | nd                      | nd                      | nd                      | nd                      | 40861<br>$\pm$ 40861   | nd                      | 36303<br>$\pm$ 36303     | 23978<br>$\pm$ 23978   | nd                     | nd                     | nd                     | nd                      |
| 10.841 | 3-Ethyl-1,5-octadiene Isomer II     | nd                     | 0                       | 43614<br>$\pm$ 43614    | 34005<br>$\pm$ 34005    | 27785<br>$\pm$ 27785   | nd                      | nd                      | nd                      | nd                      | 56658<br>$\pm$ 56658   | 105414<br>$\pm$ 52727   | 93611<br>$\pm$ 46859     | 33802<br>$\pm$ 33802   | 115940<br>$\pm$ 5244   | 73731<br>$\pm$ 36898   | nd                     | nd                      |
| 12.120 | 3-Ethyl-1,5-octadiene Isomer III    | nd                     | 176835<br>$\pm$ 89144   | 69424<br>$\pm$ 69424    | 49614<br>$\pm$ 49614    | 44240<br>$\pm$ 44240   | nd                      | nd                      | nd                      | 60603<br>$\pm$ 30305    | 251945<br>$\pm$ 126137 | 353279<br>$\pm$ 26994   | 288793<br>$\pm$ 1547     | 61631<br>$\pm$ 61631   | 253646<br>$\pm$ 5792   | 134630<br>$\pm$ 67393  | 61024<br>$\pm$ 61018   | 39337<br>$\pm$ 39337    |
| 12.387 | Ethyl (E)-hex-3-enyl carbonate      | nd                     | 1281862<br>$\pm$ 69322  | 364821<br>$\pm$ 364821  | 952468<br>$\pm$ 89863   | 469288<br>$\pm$ 236128 | 327542<br>$\pm$ 195829  | 915439<br>$\pm$ 32613   | 783317<br>$\pm$ 60145   | 412731<br>$\pm$ 206780  | nd                     | nd                      | nd                       | nd                     | 1114455<br>$\pm$ 9067  | 971174<br>$\pm$ 10796  | 826783<br>$\pm$ 27410  | 545460<br>$\pm$ 94303   |
| 12.831 | D-Limonene                          | nd                     | nd                      | nd                      | nd                      | nd                     | nd                      | nd                      | nd                      | nd                      | nd                     | nd                      | nd                       | nd                     | 53770<br>$\pm$ 26886   | nd                     | nd                     | nd                      |
| 16.429 | 1,2,3-Trimethylcyclohexane          | nd                     | nd                      | nd                      | nd                      | nd                     | nd                      | nd                      | nd                      | 67812<br>$\pm$ 34277    | nd                     | nd                      | nd                       | nd                     | nd                     | nd                     | nd                     | nd                      |
| 16.431 | 1-Undecanol                         | nd                     | nd                      | nd                      | nd                      | nd                     | 145160<br>$\pm$ 74380   | nd                      | nd                      | nd                      | nd                     | nd                      | nd                       | nd                     | nd                     | nd                     | nd                     | nd                      |
| 34.080 | 2-(4-methylphenyl)-Indolizine       | 348983<br>$\pm$ 348983 | 81589<br>$\pm$ 81589    | nd                      | nd                      | nd                     | nd                      | nd                      | nd                      | nd                      | nd                     | nd                      | nd                       | nd                     | nd                     | 790263<br>$\pm$ 790263 | 306154<br>$\pm$ 306154 | nd                      |

Abbreviations: R: Rancid; C: Control; OO: Olive oil; L at the start: Low; L at the end: Light; M at the start: Medium; M at the end: medium strength or classic flavor; H: High; S: strong or robust flavor; CP: cold press.
